# Supplementary material for: Fast Identification and Quantification of Graphene Oxide in Aqueous Environment by Raman Spectroscopy
Source: MDPI journal article supplement (doi:10.3390/nano10040770), 2020-04-16
Supplement: s1 [file s1]

## Supplementary materials

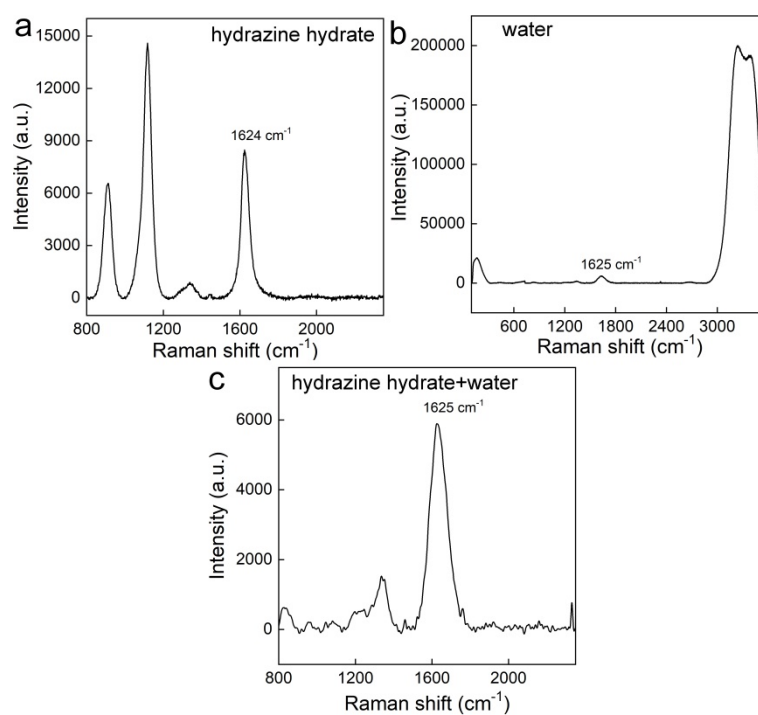

**Figure S1.** Raman spectra of hydrazine hydrate (a), water (b) and hydrazine hydrate+water (c).

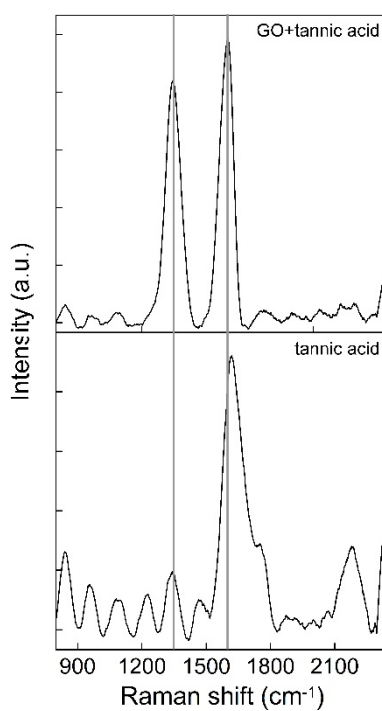

**Figure S2.** Raman spectra of GO+tannic acid (top) and tannic acid (bottom).
